# Supplementary material for: Mediodorsal thalamic nucleus mediates resistance to ethanol through Cav3.1 T-type Ca2+ regulation of neural activity
Source: eLife. 2025 Jul 18;13:RP93200. doi: 10.7554/eLife.93200 (PMC12274065; doi:10.7554/eLife.93200)
Supplement: Figure 1—source data 1. [file elife-93200-fig1-data1.xlsx]

## Sheet: Sheet1
Latency
Source	Sum Sq.	d.f.	Mean Sq.	F	p
Gene	369,150415389242	1	369,150415389242	6,59000033671867	0,0138175754513221
Dose	399,208929831716	2	199,604464915858	3,56329950115069	0,0369917302168336
Gene*Dose	150,523200109561	2	75,2616000547806	1,34355522580144	0,271648575092332
Error	2408,72034152903	43	56,0167521285821
Total	3265,95546079678	48
Duration
Source	Sum Sq.	d.f.	Mean Sq.	F	Prob>F
Gene	655,639571635706	1	655,639571635706	4,23725682920012	0,0456377970795981
Dose	2185,24862777388	2	1092,62431388694	7,06139476026009	0,002229305221967
Gene*Dose	414,511785321885	2	207,255892660943	1,3394500340768	0,272700280273
Error	6653,47953092032	43	154,732082114426
Total	9829,23639183674	48
Sedation
Source	Sum Sq.	d.f.	Mean Sq.	F	Prob>F
Gene	14536,806804059	1	14536,806804059	34,6593996601894	0,000000533327980871001
Dose	4501,31524852003	2	2250,65762426001	5,36613323331083	0,00830837057391804
Gene*Dose	743,313318615317	2	371,656659307659	0,886122851114606	0,419643894444236
Error	18035,0121093564	43	419,418886264102
Total	36511,4625750428	48
